# Supplementary material for: Physical activity and the progression of coronary artery calcification
Source: HighWire-hosted journal article supplement (doi:10.1136/heartjnl-2021-319346), 2021-09-20
Supplement: heartjnl-2021-319346supp001_data_supplement.pdf [file heartjnl-2021-319346supp001_data_supplement.pdf]

**Appendix Table 1.** Baseline characteristics by number of CAC measurements (n = 98,780)

|                           | 1 measurement | ≥ 2 measurements | P-value |
|---------------------------|---------------|------------------|---------|
| Number                    | 73,295        | 25,485           |         |
| Age                       | 41.8 (8.2)    | 42.0 (6.1)       | 0.009   |
| Men, %                    | 71.5          | 89.2             | < 0.001 |
| Physical activity, %      |               |                  | < 0.001 |
| Inactive                  | 49.4          | 46.8             |         |
| Moderately active         | 35.0          | 38.0             |         |
| HEPA                      | 15.7          | 15.2             |         |
| Current smoker, %         | 26.1          | 35.1             | < 0.001 |
| High alcohol intake, %    | 23.5          | 30.3             | < 0.001 |
| BMI, kg/m <sup>2</sup>    | 24.2 (3.3)    | 24.7 (3.1)       | < 0.001 |
| Higher education, %       | 78.3          | 79.8             | < 0.001 |
| SBP, mmHg                 | 111.7 (12.5)  | 114.3 (12.4)     | < 0.001 |
| DBP, mmHg                 | 72.4 (9.8)    | 74.9 (10.0)      | < 0.001 |
| Fasting glucose, mg/dl    | 97.2 (15.7)   | 99.5 (17.4)      | < 0.001 |
| Total cholesterol, mg/dl  | 197.8 (34.2)  | 204.6 (35.8)     | < 0.001 |
| LDL-C, mg/dl              | 127.6 (31.8)  | 131.9 (32.5)     | < 0.001 |
| HDL-C, mg/dl              | 55.7 (14.6)   | 52.6 (13.2)      | < 0.001 |
| Triglycerides, mg/dl      | 106 (75-156)  | 123 (87-177)     | < 0.001 |
| Hypertension, %           | 15.0          | 19.2             | < 0.001 |
| Diabetes, %               | 5.4           | 7.0              | < 0.001 |
| Family history of CVD, %  | 12.4          | 15.0             | < 0.001 |
| Lipid lowering therapy, % | 4.0           | 4.6              | < 0.001 |
| CAC > 0, %                | 10.5          | 21.2             | < 0.001 |
| CAC 1 – 99, %             | 8.6           | 17.7             |         |
| CAC ≥ 100, %              | 1.9           | 3.4              |         |

Numbers in the Table are mean (standard deviation), median (interquartile range), or percentages.

Abbreviations: BMI, body mass index; CAC: coronary artery calcium; CVD: cardiovascular disease; DBP: diastolic blood pressure; HDL-C, high-density lipoprotein cholesterol; HEPA, health-enhancing physically active; LDL-C, low-density lipoprotein cholesterol; and SBP: systolic blood pressure.

High alcohol intake defined as >30 g/day for men and >20 g/day for women; higher education defined as college graduate or higher.

**Appendix Table 2.** Baseline characteristics by coronary artery calcification categories at baseline (n = 25,485).

|                           | <b>CAC = 0</b> | <b>CAC 1 – 99</b> | <b>CAC ≥ 100</b> |
|---------------------------|----------------|-------------------|------------------|
| Number                    | 20,096         | 4,522             | 867              |
| Age                       | 41.0 (5.5)     | 45.1 (6.4)        | 48.4 (7.5)       |
| Men, %                    | 87.4           | 95.7              | 97.0             |
| Physical activity, %      |                |                   |                  |
| Inactive                  | 47.8           | 43.8              | 38.4             |
| Moderately active         | 37.8           | 38.8              | 39.2             |
| HEPA                      | 14.5           | 17.3              | 22.4             |
| Current smoker, %         | 33.8           | 39.5              | 41.1             |
| High alcohol intake, %    | 28.2           | 37.3              | 39.9             |
| BMI, kg/m <sup>2</sup>    | 24.6 (3.1)     | 25.3 (3.0)        | 25.5 (3.0)       |
| Higher education, %       | 79.6           | 80.9              | 78.9             |
| SBP, mmHg                 | 113.5 (12.2)   | 116.7 (12.6)      | 118.3 (12.6)     |
| DBP, mmHg                 | 74.1 (9.9)     | 77.5 (10.0)       | 78.3 (10.0)      |
| Fasting glucose, mg/dl    | 98.2 (15.3)    | 103.4 (21.7)      | 108.5 (28.3)     |
| Total cholesterol, mg/dl  | 203.0 (34.9)   | 211.2 (38.1)      | 207.4 (40.2)     |
| LDL-C, mg/dl              | 130.4 (31.9)   | 138.5 (34.1)      | 134.5 (35.7)     |
| HDL-C, mg/dl              | 53.1 (13.4)    | 50.7 (12.5)       | 50.9 (13.1)      |
| Triglycerides, mg/dl      | 119 (84-172)   | 137 (98-196)      | 135 (98-197)     |
| Hypertension, %           | 15.4           | 30.9              | 45.8             |
| Diabetes, %               | 5.1            | 12.9              | 20.9             |
| Family history of CVD, %  | 14.4           | 17.3              | 17.9             |
| Lipid-lowering therapy, % | 3.3            | 8.2               | 16.6             |

Numbers in the Table are mean (standard deviation), median (interquartile range), or percentages.

Abbreviations: BMI, body mass index; CAC: coronary artery calcium; CVD: cardiovascular disease; DBP: diastolic blood pressure; HDL-C, high-density lipoprotein cholesterol; LDL-C, low-density lipoprotein cholesterol; and SBP: systolic blood pressure.

High alcohol intake defined as >30 g/day for men and >20 g/day for women; higher education defined as college graduate or higher.

All variables evaluated were statistically different by coronary artery calcification categories at baseline ( $P$ -value < 0.001).

**Appendix Table 3.** 5-year progression of coronary artery calcium (CAC) by physical activity categories at baseline, adjusted for inverse probability weights.

|                                                  | Inactive                | Moderately active       | HEPA                    |
|--------------------------------------------------|-------------------------|-------------------------|-------------------------|
| Number                                           | 48,111                  | 35,305                  | 15,364                  |
| Mean CAC score (95% CI)                          |                         |                         |                         |
| Baseline                                         | 8.79<br>(7.75, 9.83)    | 10.96<br>(9.53, 12.39)  | 15.66<br>(12.53, 18.78) |
| Year 5                                           | 22.78<br>(20.75, 24.81) | 28.09<br>(25.61, 30.56) | 37.80<br>(32.65, 42.96) |
| 5-year difference<br>(Year 5 – baseline)         | 13.99<br>(12.68, 15.30) | 17.13<br>(15.65, 18.61) | 22.15<br>(19.26, 25.04) |
| Difference in mean CAC score<br>(95% CI)         |                         |                         |                         |
| Baseline                                         | Reference               | 2.17<br>(0.35, 3.99)    | 6.86<br>(3.40, 10.33)   |
| Year 5                                           | Reference               | 5.31<br>(2.06, 8.57)    | 15.03<br>(9.32, 20.74)  |
| Difference in differences<br>(Year 5 – baseline) | Reference               | 3.14<br>(1.16, 5.12)    | 8.16<br>(4.99, 11.34)   |

Values in the Table were estimated from a random intercept and random slope mixed model for CAC score adjusted for baseline age, sex, center, smoking, alcohol intake, education, family history of cardiovascular disease, body mass index, systolic blood pressure, LDL-cholesterol, HDL-cholesterol, triglyceride, fasting glucose, hypertension, diabetes, and lipid lowering therapy. *P*-value for trend across IPAQ categories for difference in differences was highly statistically significant ( $P < 0.001$ ).

Abbreviations: CAC, coronary artery calcium; CI, confidence interval; HEPA, health-enhancing physically active.

**Appendix Table 4.** 5-year progression of coronary artery calcium (CAC) by physical activity categories among participants with prevalent CAC (CAC > 0) at baseline, adjusted for inverse probability weights.

|                                                  | Inactive                   | Moderately active          | HEPA                       |
|--------------------------------------------------|----------------------------|----------------------------|----------------------------|
| Number                                           | 5,565                      | 4,895                      | 2,629                      |
| Mean CAC score (95% CI)                          |                            |                            |                            |
| Baseline                                         | 67.70<br>(61.03, 74.38)    | 73.37<br>(66.12, 80.43)    | 86.99<br>(74.41, 99.57)    |
| Year 5                                           | 142.43<br>(130.21, 154.65) | 156.15<br>(144.06, 168.23) | 180.11<br>(155.43, 204.80) |
| 5-year difference<br>(Year 5 – baseline)         | 74.73<br>(67.29, 82.17)    | 82.77<br>(76.03, 89.52)    | 93.13<br>(77.13, 109.13)   |
| Difference in mean CAC scores<br>(95% CI)        |                            |                            |                            |
| Baseline                                         | Reference                  | 5.67<br>(-2.35, 13.69)     | 19.29<br>(6.01, 32.56)     |
| Year 5                                           | Reference                  | 13.72<br>(-2.00, 29.44)    | 37.68<br>(11.03, 64.34)    |
| Difference in differences<br>(Year 5 – baseline) | Reference                  | 8.05<br>(-1.98, 18.07)     | 18.40<br>(0.77, 36.02)     |

Values in the Table were estimated from a random intercept and random slope mixed model for CAC score adjusted for baseline age, sex, center, smoking, alcohol intake, education, family history of cardiovascular disease, body mass index, systolic blood pressure, LDL-cholesterol, HDL-cholesterol, triglyceride, fasting glucose, hypertension, diabetes, and lipid lowering therapy. *P*-value for trend across IPAQ categories for difference in differences was 0.02.

Abbreviations: CAC, coronary artery calcium; CI, confidence interval; HEPA, health-enhancing physically active.

**Appendix Table 5.** 5-year progression of coronary artery calcium (CAC) by physical activity categories among participants with no CAC (CAC = 0) at baseline, adjusted for inverse probability weights.

|                                                      | Inactive             | Moderately active     | HEPA                  |
|------------------------------------------------------|----------------------|-----------------------|-----------------------|
| Number                                               | 42,546               | 30,410                | 12,735                |
| Mean CAC score at 5<br>years (95% CI)                | 1.34<br>(1.15, 1.53) | 1.50<br>(1.22, 1.78)  | 1.68<br>(1.13, 2.23)  |
| Difference in mean CAC<br>scores at 5 years (95% CI) | Reference            | 0.17<br>(-0.16, 0.51) | 0.36<br>(-0.22, 0.94) |

Values in the Table were estimated from a random intercept and random slope mixed model for CAC score adjusted for baseline age, sex, center, smoking, alcohol intake, education, family history of cardiovascular disease, body mass index, systolic blood pressure, LDL-cholesterol, HDL-cholesterol, triglyceride, fasting glucose, hypertension, diabetes, and lipid lowering therapy. *P*-value for trend across IPAQ categories for difference in differences 0.16.

Abbreviations: CAC, coronary artery calcium; CI, confidence interval; HEPA, health-enhancing physically active.

**Appendix Table 6.** Hazard ratios (95% confidence intervals) for the development of coronary artery calcium (CAC > 0) in participants with no coronary calcium (CAC = 0) at baseline, adjusted for inverse probability weights.

|         | <b>Inactive</b> | <b>Moderately active</b> | <b>HEPA</b>       | <b>P for trend</b> |
|---------|-----------------|--------------------------|-------------------|--------------------|
| Number  | 49,486          | 35,713                   | 14,995            |                    |
| Model 1 | Reference       | 1.02 (0.85, 1.21)        | 1.13 (0.91, 1.41) | 0.33               |
| Model 2 | Reference       | 1.02 (0.86, 1.21)        | 1.13 (0.91, 1.41) | 0.33               |
| Model 3 | Reference       | 1.05 (0.88, 1.24)        | 1.17 (0.94, 1.46) | 0.19               |
| Model 4 | Reference       | 1.05 (0.88, 1.24)        | 1.18 (0.95, 1.47) | 0.17               |
| Model 5 | Reference       | 1.05 (0.89, 1.24)        | 1.18 (0.95, 1.47) | 0.16               |

Model 1: adjusted for age, sex, and center; Model 2: Model 1 + smoking, alcohol, education, and family history of cardiovascular disease; Model 3: Model 2 + body mass index, systolic blood pressure, LDL-cholesterol, HDL-cholesterol, triglyceride, and fasting glucose; Model 4: Model 3 + history of diabetes, and history of hypertension; and Model 5: Model 4 + lipid lowering therapy.

Abbreviations: CAC, coronary artery calcium; HEPA, health-enhancing physically active.

**Appendix Table 7.** 5-year progression in the geometric mean of coronary artery calcium (CAC) by physical activity categories.

|                                                 | <b>Inactive</b>      | <b>Moderately active</b> | <b>HEPA</b>          |
|-------------------------------------------------|----------------------|--------------------------|----------------------|
| Number                                          | 48,111               | 35,305                   | 15,364               |
| Geometric mean CAC score (95% CI)               |                      |                          |                      |
| Baseline                                        | 0.64<br>(0.60, 0.68) | 0.75<br>(0.70, 0.80)     | 0.86<br>(0.78, 0.94) |
| Year 5                                          | 1.43<br>(1.36, 1.51) | 1.67<br>(1.58, 1.76)     | 2.01<br>(1.85, 2.17) |
| 5-year difference (Year 5 – baseline)           | 0.80<br>(0.74, 0.85) | 0.92<br>(0.86, 0.98)     | 1.15<br>(1.03, 1.26) |
| Difference in geometric mean CAC score (95% CI) |                      |                          |                      |
| Baseline                                        | Reference            | 0.11<br>(0.05, 0.17)     | 0.22<br>(0.13, 0.31) |
| Year 5                                          | Reference            | 0.24<br>(0.12, 0.35)     | 0.57<br>(0.40, 0.75) |
| Difference in differences (Year 5 – baseline)   | Reference            | 0.13<br>(0.14, 0.21)     | 0.35<br>(0.22, 0.48) |

Values in the Table were estimated from a random intercept and random slope mixed model for  $\log_e(\text{CAC score} + 1)$  adjusted for baseline age, sex, center, smoking, alcohol intake, education, family history of cardiovascular disease, body mass index, systolic blood pressure, LDL-cholesterol, HDL-cholesterol, triglyceride, fasting glucose, hypertension, diabetes, and lipid lowering therapy. The estimates were then exponentiated to obtain the geometric means of CAC scores at 5-years and the 5-year change. *P*-value for trend across IPAQ categories for difference in differences was highly statistically significant ( $P < 0.001$ ). Abbreviations: CAC, coronary artery calcium; CI, confidence interval; HEPA, health-enhancing physically active.

**Appendix Table 8.** 5-year progression of coronary artery calcium (CAC) by physical activity categories at baseline by age.

|                                                  | Inactive                | Moderately active       | HEPA                    |
|--------------------------------------------------|-------------------------|-------------------------|-------------------------|
| <b>Age &lt; 40</b>                               |                         |                         |                         |
| Number                                           | 4,288                   | 3,573                   | 1,127                   |
| Mean CAC score (95% CI)                          |                         |                         |                         |
| Baseline                                         | 3.12<br>(2.25, 3.98)    | 3.71<br>(2.74, 4.69)    | 3.07<br>(1.46, 4.68)    |
| Year 5                                           | 9.81<br>(8.28, 11.33)   | 10.51<br>(8.85, 12.18)  | 9.54<br>(6.63, 12.45)   |
| 5-year difference<br>(Year 5 – baseline)         | 6.69<br>(5.31, 8.07)    | 6.80<br>(5.32, 8.28)    | 6.47<br>(3.82, 9.13)    |
| Difference in mean CAC score<br>(95% CI)         |                         |                         |                         |
| Baseline                                         | 0<br>(reference)        | 0.60<br>(-0.61, 1.80)   | -0.05<br>(-1.82, 1.73)  |
| Year 5                                           | 0<br>(reference)        | 0.70<br>(-1.49, 2.91)   | -0.26<br>(-3.52, 2.99)  |
| Difference in differences<br>(Year 5 – baseline) | 0<br>(reference)        | 0.11<br>(-1.91, 2.14)   | -0.22<br>(-3.21, 2.78)  |
| <b>Age ≥ 40</b>                                  |                         |                         |                         |
| Number                                           | 7,632                   | 6,110                   | 2,755                   |
| Mean CAC score (95% CI)                          |                         |                         |                         |
| Baseline                                         | 9.74<br>(7.45, 12.02)   | 13.31<br>(10.76, 15.85) | 23.41<br>(19.72, 27.09) |
| Year 5                                           | 29.54<br>(26.35, 32.73) | 38.17<br>(34.65, 41.69) | 52.64<br>(47.45, 57.82) |
| 5-year difference<br>(Year 5 – baseline)         | 19.81<br>(17.26, 22.35) | 24.86<br>(22.08, 27.65) | 29.23<br>(25.05, 33.40) |
| Difference in mean CAC score<br>(95% CI)         |                         |                         |                         |
| Baseline                                         | 0<br>(reference)        | 3.57<br>(0.30, 6.84)    | 13.67<br>(9.42, 17.93)  |
| Year 5                                           | 0<br>(reference)        | 8.63<br>(3.99, 13.27)   | 23.09<br>(17.07, 29.12) |
| Difference in differences<br>(Year 5 – baseline) | 0<br>(reference)        | 5.06<br>(1.28, 8.83)    | 9.42<br>(4.53, 14.31)   |

Values in the Table were estimated from a random intercept and random slope mixed model for CAC score adjusted for baseline sex, center, smoking, alcohol intake, education, family history of cardiovascular disease, body mass index, systolic blood pressure, LDL-cholesterol, HDL-cholesterol, triglyceride, fasting glucose, hypertension, diabetes, and lipid lowering therapy. *P*-value for trend across IPAQ categories for difference in differences was not significant in age < 40 group (*P* = 0.95) but statistically significant on age ≥ 40 group (*P* < 0.001).

Abbreviations: CAC, coronary artery calcium; CI, confidence interval; HEPA, health-enhancing physically active.

**Appendix Table 9.** Hazard ratios (95% confidence intervals) for the development of coronary artery calcium (CAC > 0) in participants with no coronary calcium (CAC = 0) at baseline by age.

|                    | Inactive  | Moderately active | HEPA              | P for trend |
|--------------------|-----------|-------------------|-------------------|-------------|
| <b>Age &lt; 40</b> |           |                   |                   |             |
| Number             | 3,883     | 3,228             | 1,020             |             |
| Model 1            | Reference | 0.94 (0.78, 1.13) | 1.08 (0.83, 1.40) | 0.88        |
| Model 2            | Reference | 0.94 (0.78, 1.13) | 1.09 (0.83, 1.42) | 0.84        |
| Model 3            | Reference | 0.95 (0.79, 1.15) | 1.14 (0.88, 1.49) | 0.59        |
| Model 4            | Reference | 0.96 (0.80, 1.16) | 1.14 (0.88, 1.49) | 0.56        |
| Model 5            | Reference | 0.96 (0.80, 1.16) | 1.13 (0.87, 1.48) | 0.59        |
| <b>Age ≥ 40</b>    |           |                   |                   |             |
| Number             | 5,722     | 4,359             | 1,884             |             |
| Model 1            | Reference | 1.03 (0.91, 1.16) | 1.20 (1.03, 1.40) | 0.04        |
| Model 2            | Reference | 1.03 (0.91, 1.16) | 1.19 (1.02, 1.39) | 0.05        |
| Model 3            | Reference | 1.07 (0.94, 1.21) | 1.26 (1.08, 1.47) | 0.006       |
| Model 4            | Reference | 1.07 (0.95, 1.21) | 1.27 (1.09, 1.49) | 0.005       |
| Model 5            | Reference | 1.07 (0.95, 1.21) | 1.27 (1.09, 1.49) | 0.004       |

Model 1: adjusted for sex and center; Model 2: Model 1 + smoking, alcohol, education, and family history of cardiovascular disease; Model 3: Model 2 + body mass index, systolic blood pressure, LDL-cholesterol, HDL-cholesterol, triglyceride, and fasting glucose; Model 4: Model 3 + history of diabetes, and history of hypertension; and Model 5: Model 4 + lipid lowering therapy.

Abbreviations: CAC, coronary artery calcium; HEPA, health-enhancing physically active.



**Appendix Table 10.** 5-year progression of coronary artery calcium (CAC) by physical activity categories at baseline by sex.

|                                                  | Inactive                | Moderately active       | HEPA                    |
|--------------------------------------------------|-------------------------|-------------------------|-------------------------|
| <b>Men</b>                                       |                         |                         |                         |
| Number                                           | 10,472                  | 8,875                   | 3,394                   |
| Mean CAC score (95% CI)                          |                         |                         |                         |
| Baseline                                         | 10.11<br>(8.42, 11.80)  | 12.70<br>(10.89, 14.52) | 18.30<br>(15.45, 21.16) |
| Year 5                                           | 26.41<br>(24.08, 28.74) | 31.41<br>(28.93, 33.90) | 42.34<br>(38.36, 46.33) |
| 5-year difference<br>(Year 5 – baseline)         | 16.30<br>(14.44, 18.16) | 18.71<br>(16.74, 20.68) | 24.04<br>(20.81, 27.27) |
| Difference in mean CAC score<br>(95% CI)         |                         |                         |                         |
| Baseline                                         | 0<br>(reference)        | 2.59<br>(0.23, 4.95)    | 8.19<br>(4.94, 11.45)   |
| Year 5                                           | 0<br>(reference)        | 5.00<br>(1.68, 8.32)    | 15.93<br>(11.36, 20.51) |
| Difference in differences<br>(Year 5 – baseline) | 0<br>(reference)        | 2.41<br>(-0.30, 5.12)   | 7.74<br>(4.04, 11.46)   |
| <b>Women</b>                                     |                         |                         |                         |
| Number                                           | 1,448                   | 808                     | 488                     |
| Mean CAC score (95% CI)                          |                         |                         |                         |
| Baseline                                         | 1.47<br>(-0.85, 3.78)   | 3.13<br>(0.23, 6.04)    | 1.57<br>(-2.06, 5.21)   |
| Year 5                                           | 4.61<br>(1.58, 7.63)    | 9.97<br>(6.08, 13.86)   | 10.39<br>(5.47, 15.31)  |
| 5-year difference<br>(Year 5 – baseline)         | 3.14<br>(1.14, 5.14)    | 6.83<br>(4.17, 9.50)    | 8.82<br>(5.41, 12.23)   |
| Difference in mean CAC score<br>(95% CI)         |                         |                         |                         |
| Baseline                                         | 0<br>(reference)        | 1.67<br>(-1.55, 4.89)   | 0.11<br>(-3.75, 3.97)   |
| Year 5                                           | 0<br>(reference)        | 5.36<br>(0.80, 9.92)    | 5.78<br>(0.34, 11.23)   |
| Difference in differences<br>(Year 5 – baseline) | 0<br>(reference)        | 3.69<br>(0.36, 7.02)    | 5.68<br>(1.72, 9.63)    |

Values in the Table were estimated from a random intercept and random slope mixed model for CAC score adjusted for baseline age, center, smoking, alcohol intake, education, family history of cardiovascular disease, body mass index, systolic blood pressure, LDL-cholesterol, HDL-cholesterol, triglyceride, fasting glucose, hypertension, diabetes, and lipid lowering therapy. *P*-value for trend across IPAQ categories for difference in differences was highly statistically significant for both subgroups ( $P < 0.001$  and  $P = 0.002$  in men and women, respectively).

Abbreviations: CAC, coronary artery calcium; CI, confidence interval; HEPA, health-enhancing physically active.

**Appendix Table 11.** Hazard ratios (95% confidence intervals) for the development of coronary artery calcium (CAC > 0) in participants with no coronary calcium (CAC = 0) at baseline by sex.

|              | Inactive  | Moderately active | HEPA              | P for trend |
|--------------|-----------|-------------------|-------------------|-------------|
| <b>Men</b>   |           |                   |                   |             |
| Number       | 8,256     | 6,848             | 2,467             |             |
| Model 1      | Reference | 1.00 (0.90, 1.11) | 1.11 (0.97, 1.28) | 0.18        |
| Model 2      | Reference | 1.01 (0.91, 1.12) | 1.13 (0.98, 1.30) | 0.13        |
| Model 3      | Reference | 1.04 (0.94, 1.15) | 1.19 (1.34, 1.37) | 0.02        |
| Model 4      | Reference | 1.04 (0.94, 1.16) | 1.20 (1.05, 1.38) | 0.02        |
| Model 5      | Reference | 1.04 (0.94, 1.16) | 1.20 (1.05, 1.38) | 0.02        |
| <b>Women</b> |           |                   |                   |             |
| Number       | 1,349     | 739               | 437               |             |
| Model 1      | Reference | 0.92 (0.53, 1.60) | 1.18 (0.65, 2.14) | 0.72        |
| Model 2      | Reference | 0.93 (0.54, 1.61) | 1.20 (0.66, 2.17) | 0.68        |
| Model 3      | Reference | 0.95 (0.55, 1.65) | 1.23 (0.68, 2.22) | 0.60        |
| Model 4      | Reference | 0.93 (0.54, 1.61) | 1.24 (0.69, 2.25) | 0.59        |
| Model 5      | Reference | 0.94 (0.54, 1.63) | 1.24 (0.69, 2.25) | 0.57        |

Model 1: adjusted for age and center; Model 2: Model 1 + smoking, alcohol, education, and family history of cardiovascular disease; Model 3: Model 2 + body mass index, systolic blood pressure, LDL-cholesterol, HDL-cholesterol, triglyceride, and fasting glucose; Model 4: Model 3 + history of diabetes, and history of hypertension; and Model 5: Model 4 + lipid lowering therapy.

Abbreviations: CAC, coronary artery calcium; HEPA, health-enhancing physically active.

**Appendix Table 12.** 5-year progression of coronary artery calcium (CAC) by physical activity categories at baseline by Framingham Risk Score.

|                                                  | Inactive                | Moderately active       | HEPA                       |
|--------------------------------------------------|-------------------------|-------------------------|----------------------------|
| <b>FRS &lt; 10%</b>                              |                         |                         |                            |
| Number                                           | 9,457                   | 7,642                   | 2,969                      |
| Mean CAC score (95% CI)                          |                         |                         |                            |
| Baseline                                         | 10.85<br>(9.18, 12.53)  | 12.34<br>(10.48, 14.19) | 12.18<br>(9.25, 15.11)     |
| Year 5                                           | 20.88<br>(18.54, 23.23) | 24.11<br>(21.54, 26.68) | 27.16<br>(23.04, 31.27)    |
| 5-year difference<br>(Year 5 – baseline)         | 10.03<br>(8.12, 11.94)  | 11.78<br>(9.71, 13.84)  | 14.98<br>(11.62, 18.33)    |
| Difference in mean CAC score<br>(95% CI)         |                         |                         |                            |
| Baseline                                         | 0<br>(reference)        | 1.48<br>(-0.95, 3.92)   | 1.33<br>(-2.01, 4.67)      |
| Year 5                                           | 0<br>(reference)        | 3.23<br>(-0.21, 6.66)   | 6.27<br>(1.56, 10.99)      |
| Difference in differences<br>(Year 5 – baseline) | 0<br>(reference)        | 1.75<br>(-1.07, 4.56)   | 4.95<br>(1.09, 8.81)       |
| <b>FRS ≥ 10%</b>                                 |                         |                         |                            |
| Number                                           | 1,815                   | 1,454                   | 601                        |
| Mean CAC score (95% CI)                          |                         |                         |                            |
| Baseline                                         | 15.75<br>(11.52, 19.99) | 21.75<br>(17.14, 26.35) | 57.20<br>(50.40, 64.00)    |
| Year 5                                           | 59.60<br>(53.88, 65.31) | 75.82<br>(69.56, 82.08) | 121.67<br>(112.11, 131.22) |
| 5-year difference<br>(Year 5 – baseline)         | 43.84<br>(39.40, 48.28) | 54.08<br>(49.17, 58.99) | 64.47<br>(56.73, 72.21)    |
| Difference in mean CAC score<br>(95% CI)         |                         |                         |                            |
| Baseline                                         | 0<br>(reference)        | 5.99<br>(0.44, 11.54)   | 41.44<br>(33.99, 48.90)    |
| Year 5                                           | 0<br>(reference)        | 16.22<br>(8.25, 24.20)  | 62.07<br>(51.33, 72.81)    |
| Difference in differences<br>(Year 5 – baseline) | 0<br>(reference)        | 10.24<br>(3.61, 16.86)  | 20.62<br>(11.70, 29.55)    |

Values in the Table were estimated from a random intercept and random slope mixed model for CAC score adjusted for baseline age, sex, center, smoking, alcohol intake, education, family history of cardiovascular disease, body mass index, systolic blood pressure, LDL-cholesterol, HDL-cholesterol, triglyceride, fasting glucose, hypertension, diabetes, and lipid lowering therapy. *P*-value for trend across IPAQ categories for difference in differences was highly statistically significant for both subgroups (*P* = 0.009 and *P* < 0.001 in FRS < 10% and FRS ≥ 10% group, respectively).

Abbreviations: CAC, coronary artery calcium; CI, confidence interval; HEPA, health-enhancing physically active.

**Appendix Table 13.** Hazard ratios (95% confidence intervals) for the development of coronary artery calcium (CAC > 0) in participants with no coronary calcium (CAC = 0) at baseline by Framingham Risk Score.

|                     | Inactive  | Moderately active | HEPA              | P for trend |
|---------------------|-----------|-------------------|-------------------|-------------|
| <b>FRS &lt; 10%</b> |           |                   |                   |             |
| Number              | 8,000     | 6,323             | 2,386             |             |
| Model 1             | Reference | 0.99 (0.87, 1.11) | 1.17 (1.00, 1.36) | 0.18        |
| Model 2             | Reference | 0.98 (0.87, 1.11) | 1.16 (0.99, 1.35) | 0.21        |
| Model 3             | Reference | 1.00 (0.88, 1.13) | 1.18 (1.01, 1.38) | 0.11        |
| Model 4             | Reference | 1.00 (0.89, 1.13) | 1.19 (1.01, 1.39) | 0.11        |
| Model 5             | Reference | 1.00 (0.89, 1.13) | 1.19 (1.01, 1.39) | 0.10        |
| <b>FRS ≥ 10%</b>    |           |                   |                   |             |
| Number              | 1,058     | 785               | 267               |             |
| Model 1             | Reference | 1.10 (0.89, 1.37) | 1.17 (0.87, 1.56) | 0.06        |
| Model 2             | Reference | 1.11 (0.89, 1.37) | 1.20 (0.90, 1.61) | 0.05        |
| Model 3             | Reference | 1.15 (0.93, 1.43) | 1.26 (0.94, 1.69) | 0.05        |
| Model 4             | Reference | 1.16 (0.93, 1.43) | 1.32 (0.98, 1.77) | 0.04        |
| Model 5             | Reference | 1.16 (0.93, 1.44) | 1.31 (0.97, 1.75) | 0.04        |

Model 1: adjusted for age, sex, and center; Model 2: Model 1 + smoking, alcohol, education, and family history of cardiovascular disease; Model 3: Model 2 + body mass index, systolic blood pressure, LDL-cholesterol, HDL-cholesterol, triglyceride, and fasting glucose; Model 4: Model 3 + history of diabetes, and history of hypertension; and Model 5: Model 4 + lipid lowering therapy.

Abbreviations: CAC, coronary artery calcium; HEPA, health-enhancing physically active.

**Appendix Table 14.** 5-year progression of coronary artery calcium (CAC) by physical activity categories at baseline by CAC scores.

|                                                  | Inactive                   | Moderately active          | HEPA                       |
|--------------------------------------------------|----------------------------|----------------------------|----------------------------|
| <b>CAC 1–99</b>                                  |                            |                            |                            |
| Number                                           | 1,982                      | 1,756                      | 784                        |
| Mean CAC score (95% CI)                          |                            |                            |                            |
| Baseline                                         | 19.43<br>(17.92, 20.94)    | 19.86<br>(18.27, 21.44)    | 20.55<br>(18.42, 22.67)    |
| Year 5                                           | 64.47<br>(61.08, 67.85)    | 67.36<br>(63.80, 70.91)    | 71.20<br>(65.95, 76.45)    |
| 5-year difference<br>(Year 5 – baseline)         | 45.04<br>(41.83, 48.24)    | 47.50<br>(44.14, 50.86)    | 50.66<br>(45.58, 55.73)    |
| Difference in mean CAC score<br>(95% CI)         |                            |                            |                            |
| Baseline                                         | 0<br>(reference)           | 0.43<br>(-1.26, 2.11)      | 1.12<br>(-1.08, 3.32)      |
| Year 5                                           | 0<br>(reference)           | 2.89<br>(-1.81, 7.57)      | 6.74<br>(0.65, 12.82)      |
| Difference in differences<br>(Year 5 – baseline) | 0<br>(reference)           | 2.46<br>(-2.18, 7.10)      | 5.62<br>(-0.38, 11.63)     |
| <b>CAC ≥ 100</b>                                 |                            |                            |                            |
| Number                                           | 333                        | 340                        | 194                        |
| Mean CAC score (95% CI)                          |                            |                            |                            |
| Baseline                                         | 168.45<br>(119.42, 217.48) | 184.76<br>(134.99, 234.53) | 239.68<br>(179.27, 300.08) |
| Year 5                                           | 432.32<br>(367.96, 396.68) | 467.49<br>(402.97, 532.01) | 487.85<br>(407.72, 567.98) |
| 5-year difference<br>(Year 5 – baseline)         | 263.87<br>(217.66, 310.07) | 282.73<br>(237.11, 328.34) | 248.17<br>(189.70, 306.65) |
| Difference in mean CAC score<br>(95% CI)         |                            |                            |                            |
| Baseline                                         | 0<br>(reference)           | 16.31<br>(-29.30, 61.92)   | 74.23<br>(16.64, 125.81)   |
| Year 5                                           | 0<br>(reference)           | 35.17<br>(-39.00, 109.35)  | 55.53<br>(-31.02, 142.09)  |
| Difference in differences<br>(Year 5 – baseline) | 0<br>(reference)           | 18.86<br>(-46.07, 83.79)   | -15.69<br>(-90.22, 58.84)  |

Values in the Table were estimated from a random intercept and random slope mixed model for CAC score adjusted for baseline age, sex, center, smoking, alcohol intake, education, family history of cardiovascular disease, body mass index, systolic blood pressure, LDL-cholesterol, HDL-cholesterol, triglyceride, fasting glucose, hypertension, diabetes, and lipid lowering therapy. *P*-values for trend across IPAQ categories for difference in differences were not statistically significant (*P* = 0.06 and *P* = 0.78 in CAC 1–99 and CAC ≥ 100 group, respectively).

Abbreviations: CAC, coronary artery calcium; CI, confidence interval; HEPA, health-enhancing physically active.

**Appendix Table 15.** 5-year progression of coronary artery calcium (CAC) by time-varying physical activity categories at baseline.

|                                                  | Inactive                | Moderately active       | HEPA                    |
|--------------------------------------------------|-------------------------|-------------------------|-------------------------|
| Mean CAC score (95% CI)                          |                         |                         |                         |
| Baseline                                         | 10.23<br>(9.02, 11.45)  | 10.28<br>(9.01, 11.55)  | 11.30<br>(9.65, 12.96)  |
| Year 5                                           | 24.42<br>(22.65, 26.20) | 27.82<br>(25.98, 29.65) | 35.83<br>(33.29, 38.37) |
| 5-year difference<br>(Year 5 – baseline)         | 14.19<br>(12.50, 15.88) | 17.54<br>(15.72, 19.35) | 24.53<br>(21.68, 27.38) |
| Difference in mean CAC score<br>(95% CI)         |                         |                         |                         |
| Baseline                                         | 0<br>(reference)        | 0.05<br>(-1.11, 1.20)   | 1.07<br>(-0.54, 2.67)   |
| Year 5                                           | 0<br>(reference)        | 3.39<br>(1.42, 5.36)    | 11.41<br>(8.74, 14.08)  |
| Difference in differences<br>(Year 5 – baseline) | 0<br>(reference)        | 3.35<br>(0.88, 5.82)    | 10.34<br>(7.03, 13.66)  |

Values in the Table were estimated from a random intercept and random slope mixed model for CAC score adjusted for baseline age, sex, center, smoking, alcohol intake, education, family history of cardiovascular disease, body mass index, systolic blood pressure, LDL-cholesterol, HDL-cholesterol, triglyceride, fasting glucose, hypertension, diabetes, and lipid lowering therapy. *P*-value for trend across IPAQ categories for difference in differences was highly statistically significant ( $P < 0.001$ ).

Abbreviations: CAC, coronary artery calcium; CI, confidence interval; HEPA, health-enhancing physically active.

**Appendix Table 16.** 5-year progression of coronary artery calcium (CAC) by time-varying physical activity categories among participants with prevalent CAC (CAC > 0) at baseline.

|                                                  | Inactive                   | Moderately active          | HEPA                       |
|--------------------------------------------------|----------------------------|----------------------------|----------------------------|
| Mean CAC score (95% CI)                          |                            |                            |                            |
| Baseline                                         | 73.62<br>(68.33, 78.91)    | 73.45<br>(68.14, 78.76)    | 76.68<br>(70.43, 82.92)    |
| Year 5                                           | 149.08<br>(141.25, 156.91) | 154.33<br>(146.60, 162.05) | 170.87<br>(161.33, 180.41) |
| 5-year difference<br>(Year 5 – baseline)         | 75.47<br>(68.18, 82.75)    | 80.88<br>(73.63, 88.12)    | 94.19<br>(83.91, 104.48)   |
| Difference in mean CAC scores<br>(95% CI)        |                            |                            |                            |
| Baseline                                         | 0<br>(reference)           | -0.17<br>(-4.36, 4.03)     | 3.06<br>(-2.54, 8.66)      |
| Year 5                                           | 0<br>(reference)           | 5.24<br>(-1.60, 12.08)     | 21.79<br>(12.56, 31.01)    |
| Difference in differences<br>(Year 5 – baseline) | 0<br>(reference)           | 5.41<br>(-3.53, 14.35)     | 18.73<br>(6.82, 30.63)     |

Values in the Table were estimated from a random intercept and random slope mixed model for CAC score adjusted for baseline age, sex, center, smoking, alcohol intake, education, family history of cardiovascular disease, body mass index, systolic blood pressure, LDL-cholesterol, HDL-cholesterol, triglyceride, fasting glucose, hypertension, diabetes, and lipid lowering therapy. *P*-value for trend across IPAQ categories for difference in differences was 0.003.

Abbreviations: CAC, coronary artery calcium; CI, confidence interval; HEPA, health-enhancing physically active.

**Appendix Table 17.** 5-year progression of coronary artery calcium (CAC) by time-varying physical activity categories among participants with no CAC (CAC = 0) at baseline.

|                                                      | Inactive             | Moderately active    | HEPA                 |
|------------------------------------------------------|----------------------|----------------------|----------------------|
| Mean CAC score at 5<br>years (95% CI)                | 1.18<br>(0.97, 1.38) | 1.74<br>(1.52, 1.95) | 1.82<br>(1.51, 2.12) |
| Difference in mean CAC<br>scores at 5 years (95% CI) | 0<br>(reference)     | 0.56<br>(0.33, 0.79) | 0.67<br>(0.32, 1.02) |

Values in the Table were estimated from a random intercept and random slope mixed model for CAC score adjusted for baseline age, sex, center, smoking, alcohol intake, education, family history of cardiovascular disease, body mass index, systolic blood pressure, LDL-cholesterol, HDL-cholesterol, triglyceride, fasting glucose, hypertension, diabetes, and lipid lowering therapy. *P*-value for trend across IPAQ categories for difference in differences was < 0.001.

Abbreviations: CAC, coronary artery calcium; CI, confidence interval; HEPA, health-enhancing physically active.

**Appendix Table 18.** Hazard ratios (95% confidence intervals) for the development of coronary artery calcium (CAC > 0) by time-varying physical activity categories among participants with no coronary calcium (CAC = 0) at baseline.

|         | Inactive  | Moderately active | HEPA              | P for trend |
|---------|-----------|-------------------|-------------------|-------------|
| Model 1 | Reference | 0.87 (0.78, 0.96) | 0.98 (0.85, 1.12) | 0.18        |
| Model 2 | Reference | 0.92 (0.83, 1.02) | 0.98 (0.85, 1.13) | 0.41        |
| Model 3 | Reference | 1.01 (0.91, 1.12) | 1.15 (1.00, 1.33) | 0.11        |
| Model 4 | Reference | 1.03 (0.92, 1.14) | 1.17 (1.01, 1.35) | 0.06        |
| Model 5 | Reference | 1.03 (0.92, 1.14) | 1.17 (1.01, 1.36) | 0.06        |
| Model 6 | Reference | 1.02 (0.91, 1.13) | 1.17 (1.01, 1.35) | 0.08        |

Model 1: adjusted for age, sex, and center; Model 2: Model 1 + smoking, alcohol, education, and family history of cardiovascular disease; Model 3: Model 2 + body mass index, systolic blood pressure, LDL-cholesterol, HDL-cholesterol, triglyceride, and fasting glucose; Model 4: Model 3 + history of diabetes, and history of hypertension; and Model 5: Model 4 + lipid lowering therapy. Model 6: Model 5 + time difference.

Abbreviations: CAC, coronary artery calcium; HEPA, health-enhancing physically active.
